# Supplementary material
Source: HighWire-hosted journal article supplement (http://heartasia.bmj.com/highwire/filestream/136903/field_highwire_adjunct_files/0/heartasia-2013-010335supp.pdf)
Supplement: heartasia-2013-010335supp.pdf [file heartasia-2013-010335supp.pdf]

Movie I: Trans-thoracic echocardiography, apical-four chamber view, showing pedunculated, oscillating mass arising from right ventricular moderator band.

Movie II: Trans-thoracic echocardiography parasternal short axis view, showing mass oscillating in right ventricular outflow tract
